# Supplementary material for: Tannic Acid-Lung Fluid Assemblies Promote Interaction and Delivery of Drugs to Lung Cancer Cells
Source: MDPI journal article supplement (doi:10.3390/pharmaceutics10030111), 2018-08-01
Supplement: s1 [file s1]

## Supplementary Materials: Tannic Acid-Lung Fluid Assemblies Promote Interaction and Delivery of Drugs to Lung Cancer Cells

Elham Hatami <sup>1</sup>, Prashanth K.B. Nagesh <sup>1</sup>, Pallabita Chowdhury <sup>1</sup>, Subhash C. Chauhan <sup>1</sup>, Meena Jaggi <sup>1</sup>, Amali E. Samarasinghe <sup>2</sup> and Murali M. Yallapu <sup>1,\*</sup>

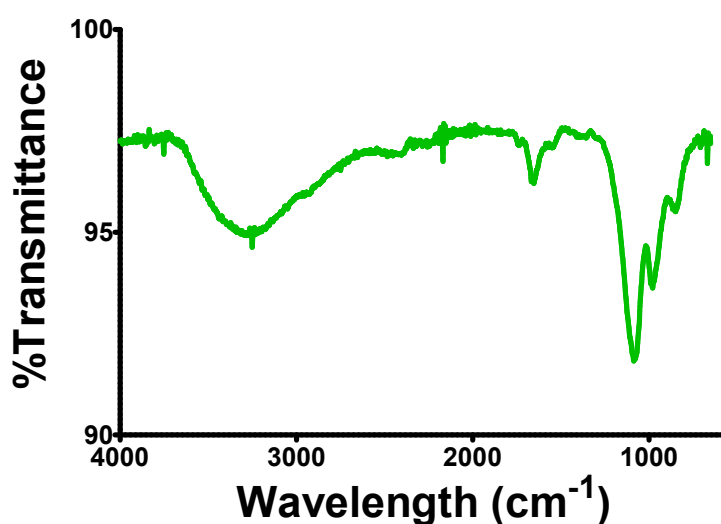

**Figure S1.** FT-IR of lung fluid. Protein characteristics peaks of the amide I band at  $1655\text{ cm}^{-1}$  (mainly C–O stretch) and amide II band at  $1525\text{ cm}^{-1}$  (C–N stretching and N–H bend) in LF. The other peaks at  $3290$  and  $1075\text{ cm}^{-1}$  corroborates to N–H and C–N stretch of the aliphatic amine.

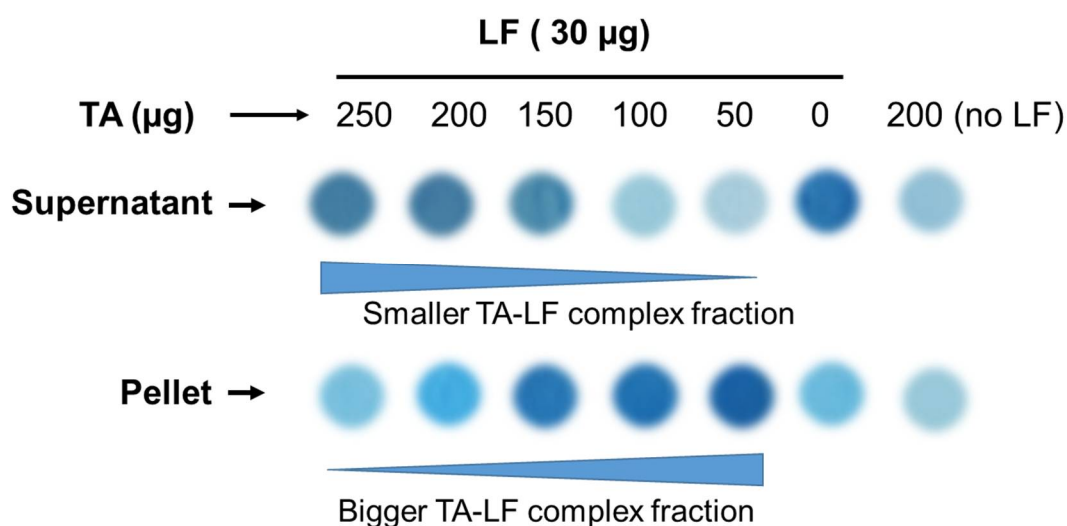

**Figure S2.** TA-LF complexes were separated by centrifugation at 5,000 rpm and supernatant and pellet TA-LF complexes were used for protein density probing on nitrocellulose membrane as mentioned in section 2.5 in the manuscript.

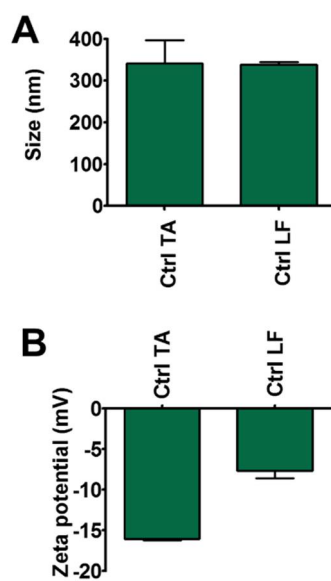

**Figure S3.** DLS data for (A) Particle size and (B) zeta potential of TA and LF. Measurements were performed using Zetasizer.
